# Supplementary material for: Biobased thin-film composite membranes comprising priamine–genipin selective layer on nanofibrous biodegradable polylactic acid support for oil and solvent-resistant nanofiltration
Source: Royal Society of Chemistry journal article supplement (doi:10.1039/d2gc01476a), 2022-01-01
Supplement: d2gc01476a1.pdf [file d2gc01476a1.pdf]

## Electronic Supplementary Information

for

**Biobased thin-film composite membranes comprising priamine–genipin selective layer on nanofibrous biodegradable polylactic acid support for oil and solvent-resistant nanofiltration**

Cong Yang<sup>1</sup>, Fuat Topuz<sup>1</sup>, Sang-Hee Park<sup>1,2</sup>, Gyorgy Szekely<sup>1\*</sup>

<sup>1</sup>Advanced Membranes and Porous Materials Center, Physical Science and Engineering Division (PSE), King Abdullah University of Science and Technology (KAUST), Thuwal, 23955-6900, Saudi Arabia

<sup>2</sup>Department of Chemical Engineering, Changwon National University (CNU), Changwon 51140, Korea

\*Corresponding author: E-mail: [gyorgy.szekely@kaust.edu.sa](mailto:gyorgy.szekely@kaust.edu.sa); Web: [www.szekelygroup.com](http://www.szekelygroup.com)

## Table of Contents

|                                                                                   |    |
|-----------------------------------------------------------------------------------|----|
| S1. Green nanofibrous support optimization.....                                   | 3  |
| S2. Polymer solubility testing .....                                              | 5  |
| S3. Membrane swelling testing .....                                               | 6  |
| S4. Green nanofibrous support characterization .....                              | 8  |
| S5. Biodegradation of the optimized h-PLA support .....                           | 8  |
| S6. Optimization of gelatin concentration.....                                    | 9  |
| S7. Reaction mechanism of Genipin-Priamine cross-linking .....                    | 10 |
| S8. Chemical characterization of TFC membranes by XPS.....                        | 11 |
| S9. Priamine structure .....                                                      | 13 |
| S10. TFC membrane optimization .....                                              | 14 |
| S11. Pore size calculation.....                                                   | 17 |
| S12. Solvent properties.....                                                      | 20 |
| S13. Oil-in-water filtration .....                                                | 20 |
| S14. Acetone permeance and styrene dimer rejection of the reported membranes..... | 21 |
| S15. Sustainability evaluation .....                                              | 22 |
| References .....                                                                  | 28 |

## S1. Green nanofibrous support optimization

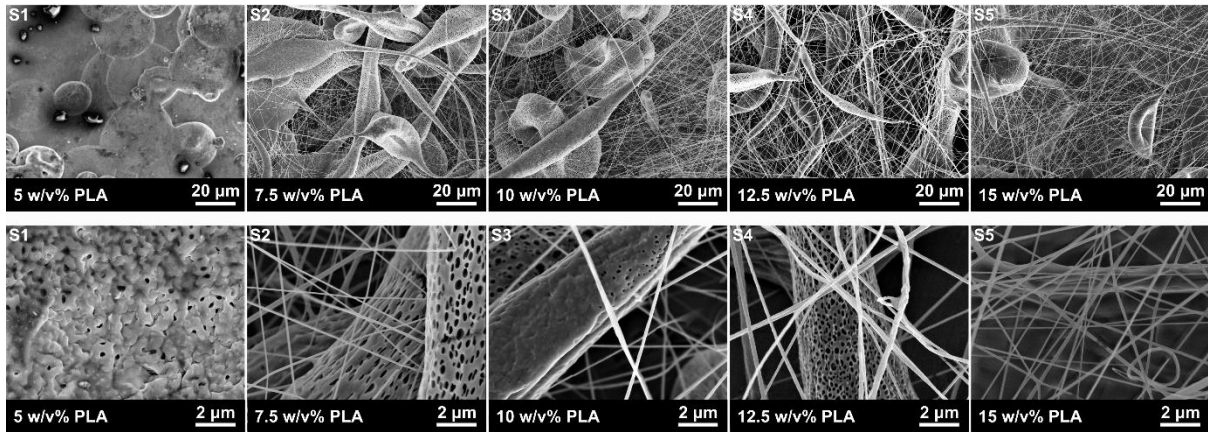

**Figure S1.** Scanning electron microscope (SEM) images of the electrospun poly(lactic acid) (PLA) microstructures/fibers at two different magnifications produced from various polymer concentrations, S1, S2, S3, S4, and S5, represent the electrospun PLA supports with 5, 7.5, 10, 12.5, and 15 w/v% PLA polymer concentration, respectively (Table 1 in the main text). The salt additive concentration was 0 w/w%, the applied voltage was 15 kV, the flow rate was 0.5 mL h<sup>-1</sup>, and the tip-to-collector distance (TCD) was 100 mm.

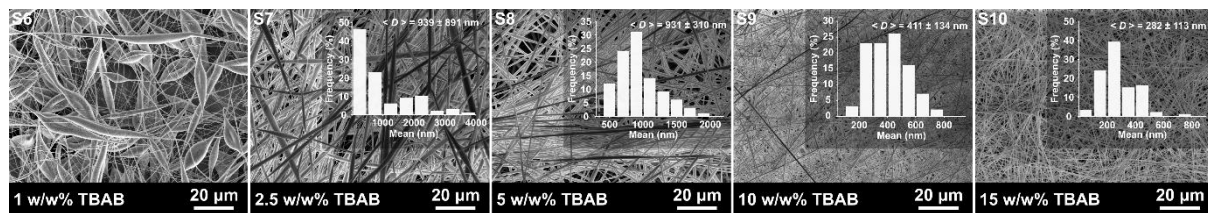

**Figure S2.** SEM images of the electrospun PLA fibers produced at different salt addition concentrations, S6, S7, S8, S9, and S10, represent the electrospun PLA supports with 1, 2.5, 5, 10, and 15 w/v% Tetrabutylammonium bromide (TBAB), respectively (Table 1 in the main text). The constant polymer concentration was 12.5 w/v% (with respect to the solvent), and the insets show the fiber size distributions. The applied voltage was 15 kV, the flow rate was 0.5 mL h<sup>-1</sup>, and the TCD was 100 mm.

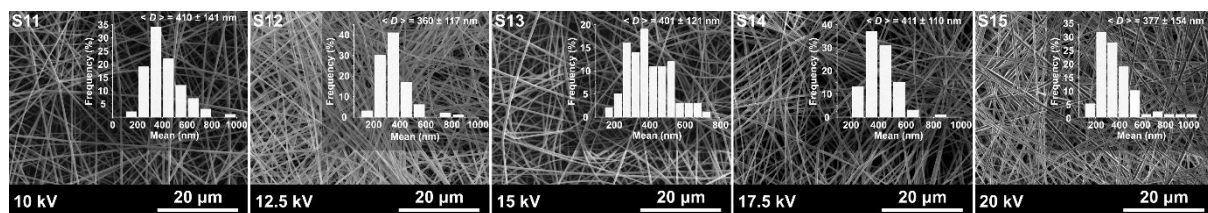

**Figure S3.** SEM images of the fabricated PLA fibers under different applied voltages, S11, S12, S13, S14, and S15, represent the PLA supports electrospun under 10, 12.5, 15, 17.5, and 20 kV, respectively (Table 1 in the main text), at a fixed polymer solution composition (12.5 w/v% PLA based on solvent and 10 w/w% TBAB based on PLA content). The insets show the fiber size distributions. The flow rate was 0.5 mL h<sup>-1</sup>, and the TCD was 100 mm.

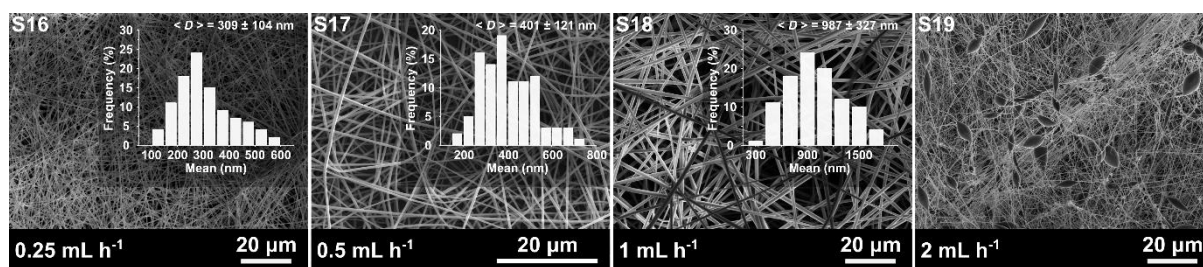

**Figure S4.** SEM images of the fabricated PLA fibers under different flow rates, S16, S17, S18, and S19, represent the PLA supports electrospun under the flow rates of 0.25, 0.5, 15, 1, and 2 mL h<sup>-1</sup>, respectively (Table 1 in the main text), at a fixed polymer solution composition (12.5 w/v% PLA based on solvent and 10 w/w% TBAB based on PLA content) at 15 kV. The insets show the fiber size distributions. The TCD was 100 mm.

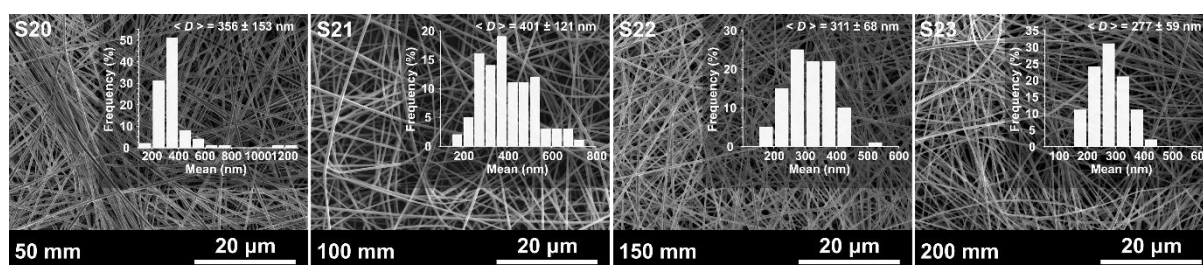

**Figure S5.** SEM images of the fabricated PLA fibers under different TCDs, S20, S21, S22, and S23, represent the PLA supports electrospun under TCDs of 50, 100, 150, and 200 mm, respectively (Table 1 in the main text), at a fixed polymer solution composition (12.5 w/v% PLA based on solvent and 10 w/w% TBAB based on PLA content) at an applied voltage of 15 kV and an injection flow rate of 0.5 mL h<sup>-1</sup>. The insets show the fiber size distributions.

## S2. Polymer solubility testing

**Table S1.** h-PLA support solubility in different organic solvents:  $\checkmark$  means the support being stable in the solvent, o represents severe swelling, while  $\times$  means dissolution.

| Solvent       | Density | Viscosity | Dielectric constant | UV  | Refractive index | Hsp   | Soluble      |
|---------------|---------|-----------|---------------------|-----|------------------|-------|--------------|
| NMP           | 1.028   | 1.67      | 32                  | 285 | 1.47             | 23    | o            |
| DMAc          | 0.937   | 2.14      | 37.8                | 268 | 1.438            | 22.8  | o            |
| DMF           | 0.944   | 0.92      | 36.6                | 268 | 1.43             | 24.9  | o            |
| DMSO          | 1.1     | 2.24      | 46.7                | 268 | 1.479            | 26.7  | o            |
| THF           | 0.889   | 0.55      | 7.6                 | 212 | 1.407            | 19.5  | $\times$     |
| MeTHF         | 0.854   | 0.558     | 6.97                | -   | 1.406            | 18.1  | $\checkmark$ |
| MeOH          | 0.791   | 0.55      | 32.6                | 205 | 1.329            | 29.6  | $\checkmark$ |
| EtOH          | 0.816   | 1.1       | 25.55               | 205 | 1.363            | 26.5  | $\checkmark$ |
| IPA           | 0.786   | 2.86      | 18.3                | 21  | 1.377            | 23.6  | $\checkmark$ |
| MEK           | 0.805   | 0.42      | 18.5                | 329 | 1.379            | 19.05 | $\checkmark$ |
| Acetone       | 0.791   | 0.32      | 20.7                | 330 | 1.359            | 19.9  | $\checkmark$ |
| Acetonitrile  | 0.786   | 0.37      | 37.5                | 190 | 1.344            | 24.4  | $\checkmark$ |
| Ethyl acetate | 0.902   | 0.46      | 6.02                | 256 | 1.372            | 18.2  | $\checkmark$ |
| Toluene       | 0.865   | 0.59      | 2.4                 |     |                  | 18.2  | o            |

### S3. Membrane swelling testing

**Table S2.** Swelling test results of the h-PLA support (each sample was measured thrice).

| Solvents | dry weight $m_1$ (mg) |       |       | wet weight $m_2$ (mg) |       |       | $\Delta m$ after 24 h |       |       | Rs%    |        |        |
|----------|-----------------------|-------|-------|-----------------------|-------|-------|-----------------------|-------|-------|--------|--------|--------|
|          | 1                     | 2     | 3     | 1                     | 2     | 3     | 1                     | 2     | 3     | 1      | 2      | 3      |
| DMF      | 9.34                  | 9.34  | 9.33  | 58.83                 | 58.84 | 58.85 | 49.49                 | 49.50 | 49.51 | 530.13 | 530.26 | 530.34 |
| DMSO     | 8.47                  | 8.49  | 8.47  | 47.43                 | 47.44 | 47.45 | 38.96                 | 38.95 | 38.98 | 459.62 | 459.55 | 459.88 |
| MeCN     | 11.80                 | 11.81 | 11.80 | 24.75                 | 24.67 | 24.60 | 12.95                 | 12.86 | 12.79 | 109.70 | 108.91 | 108.37 |
| Acetone  | 13.09                 | 19.10 | 13.09 | 57.83                 | 57.67 | 57.48 | 44.73                 | 38.57 | 44.39 | 296.41 | 255.56 | 294.14 |
| MEK      | 8.05                  | 8.06  | 8.05  | 17.77                 | 17.75 | 17.76 | 9.71                  | 9.70  | 9.71  | 120.60 | 120.40 | 120.50 |
| EtOH     | 13.54                 | 13.54 | 13.55 | 65.48                 | 65.42 | 65.38 | 51.93                 | 51.88 | 51.83 | 383.42 | 383.03 | 382.65 |
| Toluene  | 10.64                 | 10.63 | 10.63 | 68.92                 | 68.82 | 68.73 | 58.28                 | 58.19 | 58.10 | 548.23 | 547.41 | 546.51 |
| Heptane  | 12.73                 | 12.74 | 12.74 | 41.73                 | 41.68 | 41.65 | 29.01                 | 28.94 | 28.91 | 227.75 | 227.27 | 227.01 |

**Table S3.** Swelling test results of the free-standing selective layer (each sample was measured thrice).

| Solvents | dry weight $m_1$ (mg) |       |       | wet weight $m_2$ (mg) |       |       | $\Delta m$ after 24 h |       |       | $R_s\%$ |        |        |
|----------|-----------------------|-------|-------|-----------------------|-------|-------|-----------------------|-------|-------|---------|--------|--------|
|          | 1                     | 2     | 3     | 1                     | 2     | 3     | 1                     | 2     | 3     | 1       | 2      | 3      |
| DMF      | 12.93                 | 12.93 | 12.93 | 26.81                 | 26.74 | 26.72 | 13.88                 | 13.81 | 13.79 | 107.32  | 106.82 | 106.60 |
| DMSO     | 7.54                  | 7.54  | 7.54  | 17.33                 | 17.42 | 17.74 | 9.80                  | 9.89  | 10.20 | 129.99  | 131.20 | 135.40 |
| MeCN     | 4.69                  | 4.69  | 4.70  | 4.73                  | 4.72  | 4.72  | 0.04                  | 0.03  | 0.03  | 0.77    | 0.68   | 0.62   |
| Acetone  | 6.12                  | 6.11  | 6.12  | 6.35                  | 6.32  | 6.30  | 0.23                  | 0.21  | 0.18  | 3.78    | 3.42   | 3.01   |
| MEK      | 4.92                  | 4.92  | 4.91  | 5.37                  | 5.37  | 5.61  | 0.46                  | 0.45  | 0.69  | 9.29    | 9.24   | 14.13  |
| EtOH     | 5.17                  | 5.17  | 5.18  | 5.89                  | 5.76  | 5.64  | 0.71                  | 0.59  | 0.47  | 13.80   | 11.37  | 9.06   |
| Toluene  | 5.88                  | 5.88  | 5.88  | 7.66                  | 7.39  | 7.24  | 1.78                  | 1.51  | 1.37  | 30.27   | 25.70  | 23.26  |
| Heptane  | 5.11                  | 5.11  | 5.11  | 5.15                  | 5.15  | 5.15  | 0.04                  | 0.04  | 0.03  | 0.84    | 0.74   | 0.67   |

#### S4. Green nanofibrous support characterization

The dynamic mechanical analysis of the optimized PLA support and the h-PLA support was performed five times (from different places of the whole support), and the mean value and error were obtained.

**Table S4.** Mechanical properties of the optimized h-PLA support and the PLA support.

| Sample name   | Tensile strength (MPa) | Young's modulus (MPa) | Elongation at break (%) |
|---------------|------------------------|-----------------------|-------------------------|
| h-PLA support | $4.55 \pm 0.82$        | $60.12 \pm 6.27$      | $82.34 \pm 11.11$       |
| PLA support   | $1.62 \pm 0.23$        | $25.36 \pm 1.57$      | $34.28 \pm 2.94$        |

#### S5. Biodegradation of the optimized h-PLA support

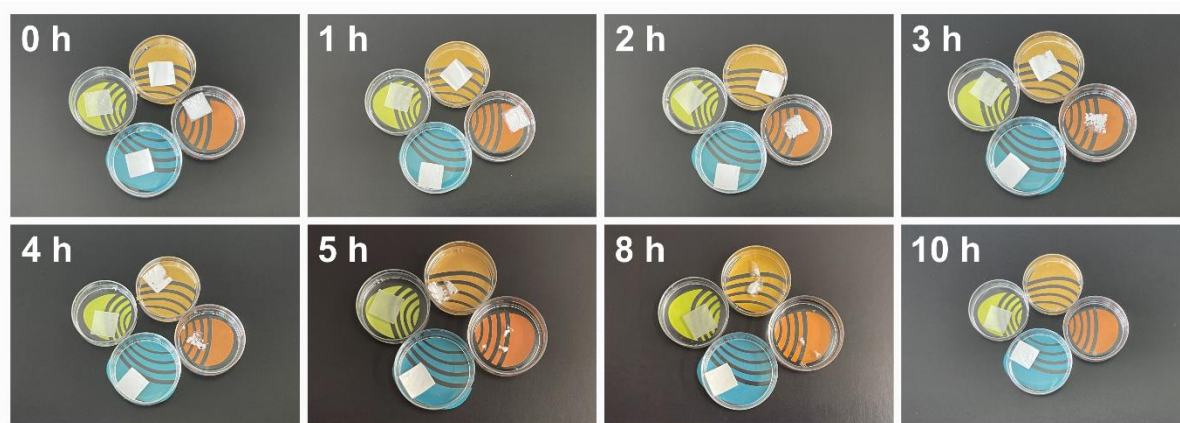

**Figure S6.** Biodegradability of the optimized h-PLA supports in 10 h: the orange dish (top) and the red dish (right) contain the h-PLA support with  $200 \mu\text{g mL}^{-1}$  Proteinase K in 0.05 M Tris buffer solution, the blue dish (down) has the h-PLA support but with Type II water, while the green plate (left) contains the PP membrane with Proteinase K in 0.05 M Tris buffer solution.



## S6. Optimization of gelatin concentration

**Table S5.** G-h-PLA supports with different gelatin concentrations (the solvent was water, and the support was h-PLA).

| G-h-PLA | $C_{\text{gelatin}}$ (w/v%) |
|---------|-----------------------------|
| G0      | 0                           |
| G1      | 1                           |
| G2      | 2                           |
| G3      | 3                           |
| G4      | 4                           |
| G5      | 5                           |

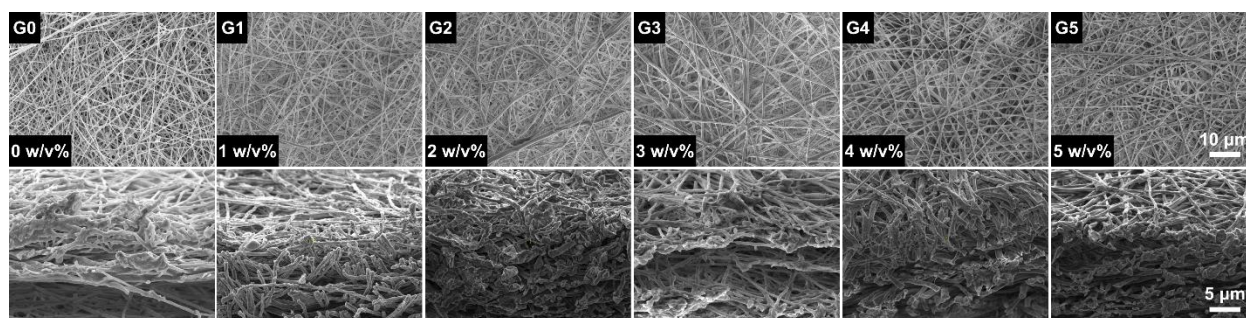

**Figure S7.** Surface and cross-sectional SEM images of the h-PLA support and the gelation interlayer supports with different gelatin concentrations.

### S7. Reaction mechanism of Genipin–Priamine cross-linking

Due to the presence of the ester group on the genipin molecule, the  $S_N2$  nucleophilic substitution of an amine group is observed during the cross-linking process<sup>1</sup>. Consequently, an intermediate aldehyde group is formed by an initial nucleophilic attack on genipin from a primary amine group. Subsequently, this aldehyde group is attacked by the secondary amine resulting from the previous step; therefore, the dihydropyran ring is opened<sup>2</sup>. Based on this, a heterocyclic compound of genipin linked to the priamine residue is formed.

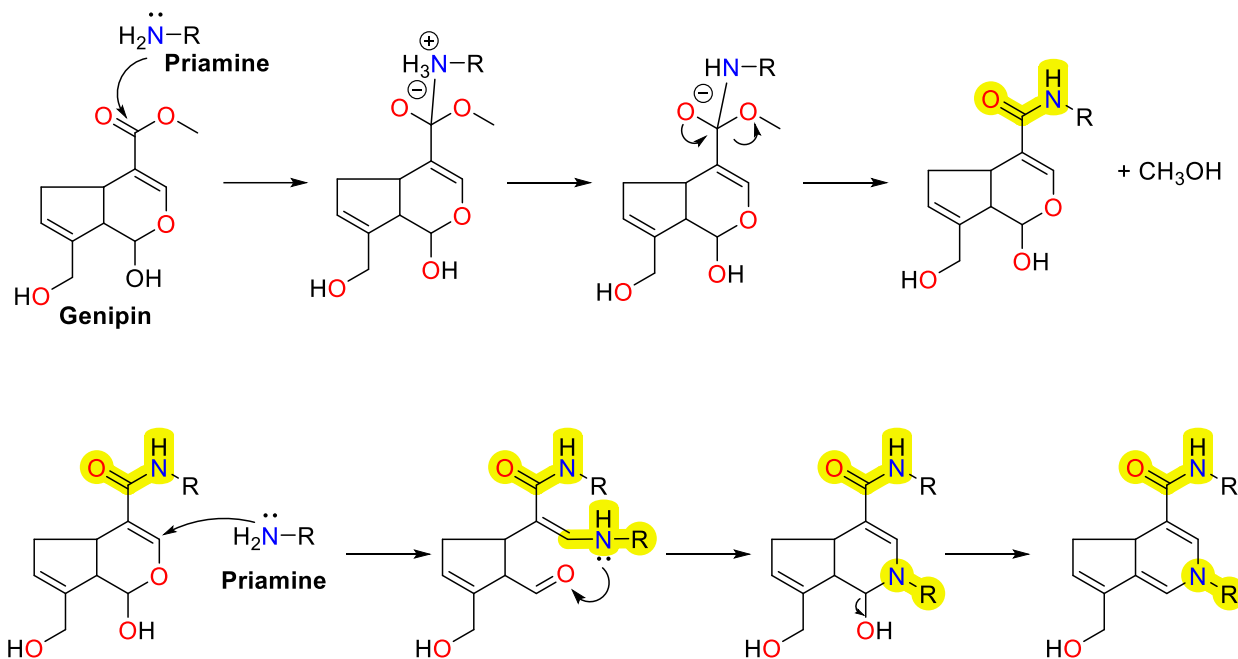

**Figure S8.** Two-step cross-linking mechanism of genipin and priamine.

## S8. Chemical characterization of TFC membranes by XPS

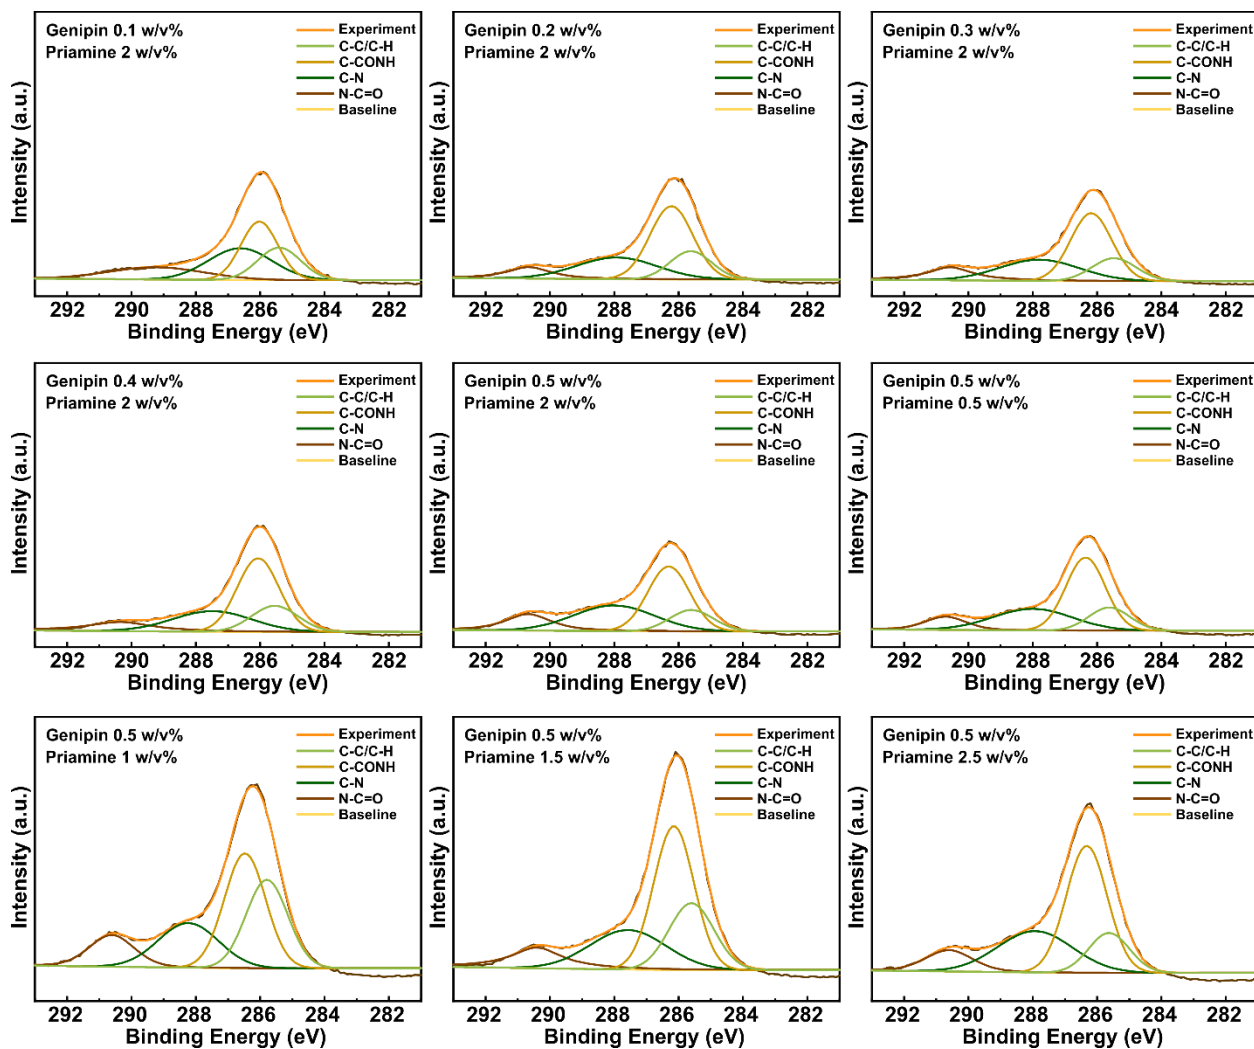

**Figure S9.** X-ray photoelectron spectroscopy (XPS) C 1s narrow scan results of green thin-film composite (TFC) membranes prepared with different genipin and priamine concentrations.

**Table S6.** Convolved XPS narrow scanning C 1s peaks for each membrane (Table 2 in the main text).

|     | Peaks area |          |              |          | SUM      | Ratio   |         |              |         |
|-----|------------|----------|--------------|----------|----------|---------|---------|--------------|---------|
|     | N-C=O      | C-N      | C-CONH/C-COO | C-H/C-C  |          | N-C=O   | C-N     | C-CONH/C-COO | C-H/C-C |
| M6  | 642.9296   | 1112.72  | 1184.327     | 764.246  | 3704.223 | 17.3567 | 30.0392 | 31.9723462   | 20.6317 |
| M7  | 547.8901   | 1137.903 | 1496.74      | 511.0872 | 3693.62  | 14.8334 | 30.8073 | 40.522306    | 13.837  |
| M8  | 481.7604   | 930.3508 | 1532.714     | 555.0428 | 3499.868 | 13.7651 | 26.5825 | 43.7934802   | 15.859  |
| M9  | 475.7448   | 894.7207 | 1685.261     | 666.0182 | 3721.745 | 12.7828 | 24.0404 | 45.2814741   | 17.8953 |
| M2  | 386.0634   | 958.137  | 1724.787     | 645.2721 | 3714.26  | 10.3941 | 25.7962 | 46.4368946   | 17.3728 |
| M10 | 852.3339   | 1474.101 | 2591.139     | 2026.341 | 6943.915 | 12.2745 | 21.2287 | 37.3152465   | 29.1815 |
| M11 | 869.0316   | 1648.61  | 3175.64      | 1648.083 | 7341.365 | 11.8375 | 22.4565 | 43.2568058   | 22.4493 |
| M12 | 347.5492   | 941.7687 | 1581.274     | 520.9391 | 3391.531 | 10.2476 | 27.7682 | 46.6241942   | 15.36   |
| M13 | 618.6356   | 1701.462 | 2858.182     | 890.5386 | 6068.818 | 10.1937 | 28.0361 | 47.0961891   | 14.674  |

S9. Priamine structure

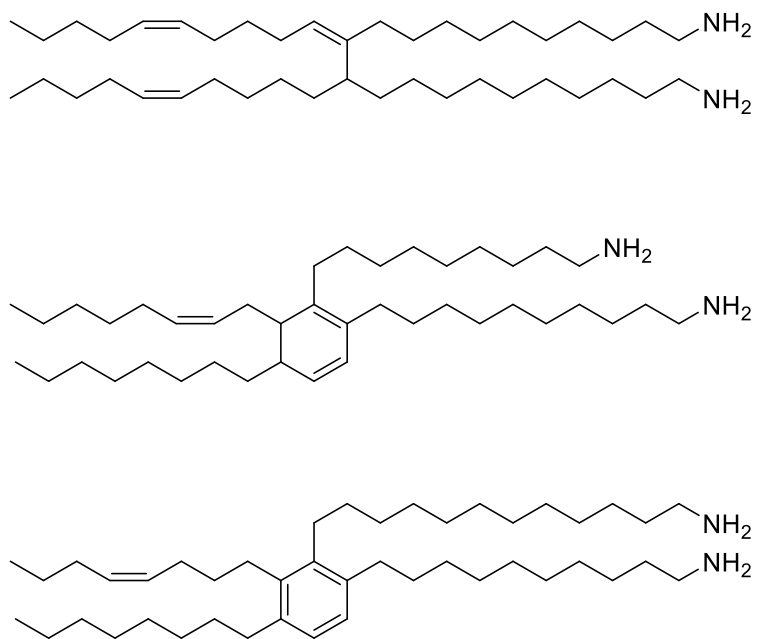

**Figure S10.** Commercial priamine with different structures.

## S10. TFC membrane optimization

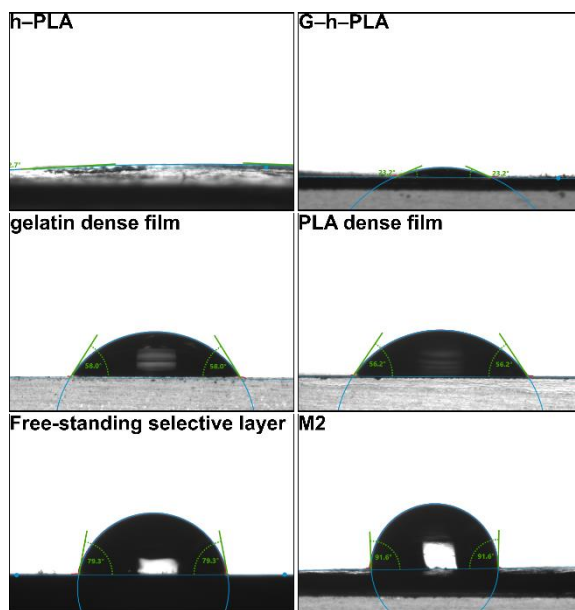

**Figure S11.** Water contact angle on the electrospun green support h-PLA, the support with interlayer G-h-PLA, the gelatin dense film, the PLA dense film, the free-standing selective layer, and M2. All the results were taken after 10 s when the water drop touched the surface.

**Table S7.** Free-standing (FS) selective layer fabrication with different monomer concentrations. The solvent for the genipin aqueous phase was water, and it was eucalyptol for the priamine organic phase.

| Selective layer | $C_{\text{Genipin}}$ (w/v%) | $C_{\text{Priamine}}$ (w/v%) |
|-----------------|-----------------------------|------------------------------|
| FS1             | 0.1                         | 2                            |
| FS2             | 0.2                         | 2                            |
| FS3             | 0.3                         | 2                            |
| FS4             | 0.4                         | 2                            |
| FS5             | 0.5                         | 2                            |
| FS6             | 0.5                         | 0.5                          |
| FS7             | 0.5                         | 1                            |
| FS8             | 0.5                         | 1.5                          |
| FS9             | 0.5                         | 2.5                          |

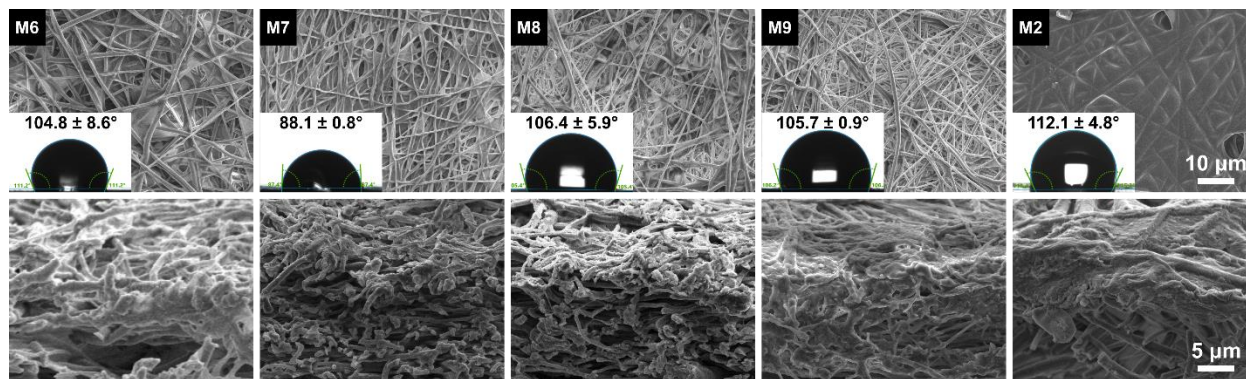

**Figure S12.** Surface and cross-sectional SEM images of green TFC membranes fabricated with different genipin concentrations. The insets show the water droplets on the respective TFC membranes.

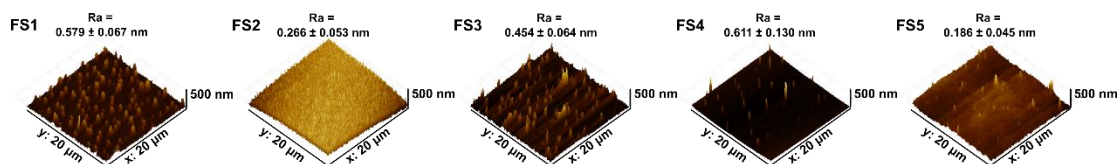

**Figure S13.** Atomic force microscope (AFM) images of free-standing thin films prepared with different genipin concentrations.

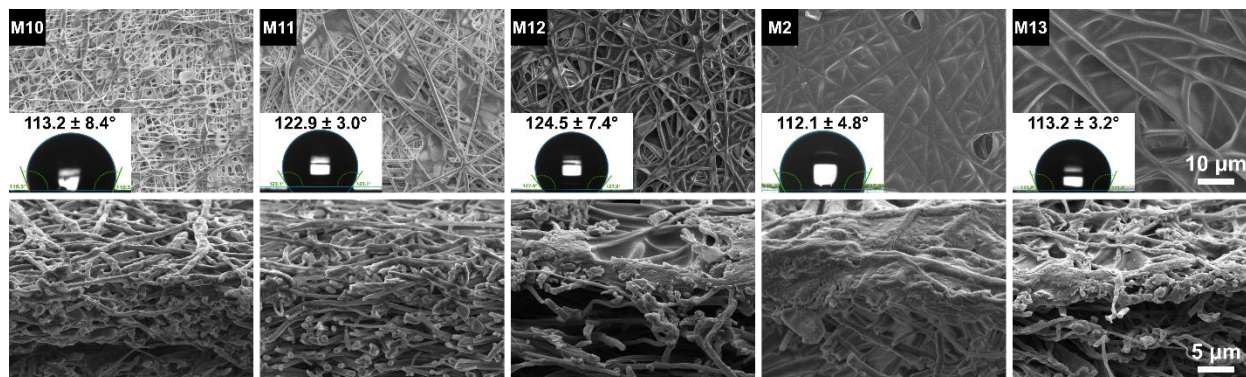

**Figure S14.** Surface and cross-sectional SEM images of green TFC membranes fabricated with different priamine concentrations.

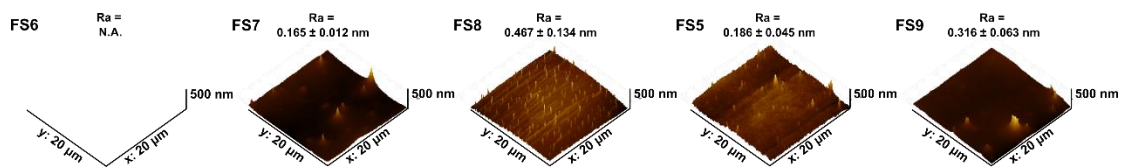

**Figure S15.** AFM images of free-standing thin films prepared with different priamine concentrations.



## S11. Pore size calculation

**Table S8.** Physical properties of acetone <sup>3</sup>.

| Solvent | $M_w^a$<br>(Da) | $d_m^b$<br>(nm) | $H^c$<br>(mPa s) | $V_m^d$<br>(cm <sup>3</sup> mol <sup>-1</sup> ) | $\rho^e$<br>(g ml <sup>-1</sup> ) | $\delta_d^f$<br>(MPa <sup>0.5</sup> ) | $\delta_p^g$<br>(MPa <sup>0.5</sup> ) | $\delta_h^h$<br>(MPa <sup>0.5</sup> ) | $\delta_t^i$<br>(MPa <sup>0.5</sup> ) |
|---------|-----------------|-----------------|------------------|-------------------------------------------------|-----------------------------------|---------------------------------------|---------------------------------------|---------------------------------------|---------------------------------------|
| AcMe    | 58.08           | 0.308           | 0.316            | 74.166                                          | 0.784                             | 15.5                                  | 10.4                                  | 7.0                                   | 19.9                                  |

<sup>a</sup> Molar mass; <sup>b</sup> diameter; <sup>c</sup> dynamic viscosity; <sup>d</sup> molar volume; <sup>e</sup> density; <sup>f,g,h,i</sup> Hansen parameters (dispersion, polar, hydrogen bonding, and total, respectively).

As suggested by Livingston et al., the permeance of a solvent can be correlated with its physical properties <sup>4</sup>. The diameter of acetonitrile is calculated as follows.

$$d_m = 2 \cdot \left( \frac{3V_m}{4\pi N_A} \right)^{\frac{1}{3}}, \quad \text{S1}$$

where  $V_m$  is the molar volume obtained from the solvent density and  $N_A$  is Avogadro's number. The Hagen–Poiseuille equation defines the volumetric flux ( $J_v$ ) through a membrane comprising uniform capillaries as follows.

$$J_{v,i} = \frac{r_i^2 \Delta P \varepsilon}{8\mu_0 l}, \quad \text{S2}$$

where  $\varepsilon$  is the porosity,  $\Delta P$  is the transmembrane pressure,  $l$  is the capillary length,  $\mu_0$  is the solvent bulk viscosity, and  $r_i$  is the capillary radius. Using the pore flow rate ( $Q_{p,i}$ ), the flow through a pore with the radius  $r_i$  can be calculated as follows.

$$Q_{p,i} = \frac{\pi r_i^4 \Delta P}{8\mu_0 l}. \quad \text{S3}$$

The overall solute rejection can be calculated using the following equations.

$$R_{ij} = 1 - \frac{\Phi_{ij} K_{c,ij}}{1 - (1 - \Phi_{ij} K_{c,ij}) \exp(-P_{e,ij})}, \quad \text{S4}$$

where  $\Phi_{ij}$  is the partition coefficient,  $K_{c,ij}$  is the solute convective factor,  $K_{d,ij}$  is the diffusive hindrance factor, and  $\lambda_{ij}$  is the ratio between solute radius  $r_{s,j}$  (subindex for a solute is  $j$ ) and pore radius  $r_i$  (the subindex for a pore size class in the discrete method is  $i$ ).

$$\Phi_{ij} = (1 - \lambda_{ij})^2, \quad \text{S5}$$

$$\lambda_{ij} = \frac{r_{s,j}}{r_i}. \quad \text{S6}$$

Assuming that a steric interaction occurs between the solute and the pore wall,  $K_{c,ij}$  and  $K_{d,ij}$  are expressed as follows.

$$K_{c,ij} = (2 - \Phi_{ij}) (1 + 0.054\lambda_{ij} - 0.988\lambda_{ij}^2 + 0.44\lambda_{ij}^3), \quad \text{S7}$$

$$K_{d,ij} = 1 - 2.3\lambda_{ij} + 1.154\lambda_{ij}^2 + 0.224\lambda_{ij}^3. \quad \text{S8}$$

The Peclet number ( $P_{e,ij}$ ) characterizing the pore flow is defined as

$$P_{e,ij} = \frac{K_{c,ij}}{K_{d,ij} D_{s,j}} \left( \frac{r_i^2 \Delta P}{8\mu_{p,i}} \right). \quad \text{S9}$$

The diffusivity  $D_{s,ij}$  of a solute with the radius  $r_{s,j}$  is calculated using the Stokes–Einstein equation.

$$D_{s,ij} = \frac{kT}{6\pi\mu_{p,i} r_{s,j}}, \quad \text{S10}$$

where  $k$  is the Boltzmann constant and  $T$  is the temperature. The Wilke–Chang formula can be used to solve the above equation and estimate solute diffusivity as follows.

$$D_{s,ij} = 7.4 \times 10^{-8} \frac{T \sqrt{\phi M_{solv}}}{\mu_{p,i} V_{m,j}^{0.6}}, \quad \text{S11}$$

where  $M_{solv}$  is the molecular weight ( $M_w$ ) of the solvent molecule,  $\phi$  is a dimensionless solvent parameter, and  $V_{m,j}$  is the solute molar volume (in  $\text{cm}^3 \text{g mol}^{-1}$ ). If the rejection value  $R(r)$  is a continuous function of the pore radius  $r$ , PDF  $f_R(r)$  is introduced to describe the pore size distribution.

$$f(r) = \frac{1}{r\sqrt{2\pi b}} \exp\left[-\frac{(\log(r/r^*) + b/2)^2}{2b}\right], \quad \text{S12}$$

where

$$b = \log\left[1 + \left(\frac{\sigma}{r^*}\right)^2\right]. \quad \text{S13}$$

To calculate  $f(r)$ , the mean pore radius ( $r^*$ ) and its standard deviation ( $\sigma$ ) must be estimated. For simplification, the distribution function is truncated to  $r_{\max}$ .

$$\frac{f'_R(r)}{f_R(r)} = \frac{1}{\int_0^{r_{\max}} f_R(r) dr} \quad \text{S14}$$

The overall rejection value over the pore radius range of  $0 < r < r_{\max}$  can then be calculated as follows.

$$R_j = \frac{\int_0^{r_{\max}} f'_R(r) r^4 R(r) / \mu(r) dr}{\int_0^{r_{\max}} f'_R(r) r^4 / \mu(r) dr} \quad \text{S15}$$

By implementing the above models, the mean pore size and its standard deviation can be fitted by minimizing the error.

## S12. Solvent properties

**Table S9.** Hansen solubility parameter and the physical properties of the organic solvent used in this study.

| Solvent                | Molar diameter<br>( $d_m$ , nm) | Viscosity<br>( $\eta$ , cP) at 25°C | Hansen solubility parameter<br>(MPa <sup>1/2</sup> ) | $\delta_{p,s} \eta_s^{-1} d_{m,s}^{-2}$ |
|------------------------|---------------------------------|-------------------------------------|------------------------------------------------------|-----------------------------------------|
|                        |                                 |                                     | $\delta_P$ (Intermolecular force)                    |                                         |
| Toluene                | 0.7                             | 0.55                                | 1.4                                                  | 4.843                                   |
| Ethanol                | 0.57                            | 1.22                                | 8.8                                                  | 21.327                                  |
| Methyl ethyl<br>ketone | 0.66                            | 0.4                                 | 9                                                    | 50.393                                  |
| Acetone                | 0.62                            | 0.3                                 | 10.4                                                 | 84.547                                  |
| Acetonitrile           | 0.55                            | 0.34                                | 18                                                   | 160.822                                 |

## S13. Oil-in-water filtration

**Table S10.** Oil-in-water filtration at different priamine concentrations.

| Membrane | Mean oil removal<br>efficiency (%) | Standard<br>deviation | Water permeance<br>(L m <sup>-2</sup> h <sup>-1</sup> bar <sup>-1</sup> ) | Standard<br>deviation |
|----------|------------------------------------|-----------------------|---------------------------------------------------------------------------|-----------------------|
| M10      | 18.86                              | 4.09                  | 87.55                                                                     | 3.15                  |
| M11      | 57.55                              | 3.08                  | 16.39                                                                     | 0.91                  |
| M12      | 66.11                              | 2.47                  | 12.02                                                                     | 0.58                  |
| M2       | 93.55                              | 2.35                  | 7.51                                                                      | 0.4                   |
| M13      | 99.6                               | 0.36                  | 5.59                                                                      | 0.35                  |

S14. Acetone permeance and styrene dimer rejection of the reported membranes

**Table S11.** Summary of integrally skinned asymmetric (ISA), TFC, and MMM membrane performance.

| Sample No | Membrane type      | Acetone permeance<br>(L m <sup>-2</sup> h <sup>-1</sup> bar <sup>-1</sup> ) | Styrene dimer rejection (%) | Ref. |
|-----------|--------------------|-----------------------------------------------------------------------------|-----------------------------|------|
| 1         | ISA                | 0.3                                                                         | 9                           | [5]  |
| 2         | ISA                | 0.32                                                                        | 99                          | [5]  |
| 3         | ISA                | 1.03                                                                        | 91                          | [5]  |
| 4         | ISA                | 1.05                                                                        | 99                          | [5]  |
| 5         | ISA                | 2                                                                           | 95                          | [5]  |
| 6         | ISA                | 4                                                                           | 92                          | [5]  |
| 7         | ISA                | 6                                                                           | 80                          | [5]  |
| 8         | ISA                | 7                                                                           | 75                          | [5]  |
| 9         | ISA                | 0.97                                                                        | 99                          | [6]  |
| 10        | ISA                | 0.76                                                                        | 97                          | [6]  |
| 11        | ISA                | 1                                                                           | 89                          | [7]  |
| 12        | ISA                | 1.5                                                                         | 77                          | [8]  |
| 13        | TFC                | 7                                                                           | 99                          | [9]  |
| 14        | TFC                | 8.5                                                                         | 97                          | [9]  |
| 15        | TFC                | 0.2                                                                         | 98                          | [9]  |
| 16        | TFC                | 0.42                                                                        | 97.5                        | [9]  |
| 17        | TFC                | 2.5                                                                         | 95                          | [5]  |
| 18        | MMM                | 1.04                                                                        | 90                          | [5]  |
| 19        | MMM                | 0.9                                                                         | 90                          | [10] |
| 20        | MMM                | 1.3                                                                         | 90                          | [5]  |
| 21        | chitosan green TFC | 31.7                                                                        | 60.455                      | [11] |
| 22        | chitosan green TFC | 6.85                                                                        | 86.23                       | [11] |

## S15. Sustainability evaluation

**Table S12.** Total mole number of petroleum-based monomers.

| No. | Monomer & additive                 | Mole number (mmol) | Total mole number (mmol) | Application | Reference |
|-----|------------------------------------|--------------------|--------------------------|-------------|-----------|
| 0   | Genipin                            | 1.1                | 2.7                      | OSN         | This work |
|     | Priamine                           | 1.6                |                          |             |           |
| 1   | Resorcinol                         | 19                 | 19.8                     | OSN         | [9]       |
|     | Trimesoyl chloride                 | 0.8                |                          |             |           |
| 2   | m-Phenylenediamine                 | 19                 | 39.8                     | FO          | [12]      |
|     | Trimesoyl chloride                 | 0.4                |                          |             |           |
|     | Sodium dodecyl sulfate             | 0.4                |                          |             |           |
|     | Triethylamine                      | 20                 |                          |             |           |
| 3   | m-Phenylenediamine                 | 14                 | 14.2                     | RO          | [13]      |
|     | Trimesoyl chloride                 | 0.2                |                          |             |           |
| 4   | m-Phenylenediamine                 | 37                 | 40.8                     | RO          | [14]      |
|     | Trimesoyl chloride                 | 3.8                |                          |             |           |
| 5   | m-Phenylenediamine                 | 19                 | 19.4                     | OSN         | [15]      |
|     | Trimesoyl chloride                 | 0.4                |                          |             |           |
| 6   | Piperazine                         | 6                  | 9.5                      | NF          | [16]      |
|     | 3,3',5'-iphenyl tetraacyl chloride | 0.3                |                          |             |           |
|     | Sodium hydroxide                   | 3                  |                          |             |           |
|     | Sodium dodecyl sulfate             | 0.2                |                          |             |           |
| 7   | Piperazine                         | 24                 | 24.8                     | NF          | [17]      |
|     | Trimesoyl chloride                 | 0.8                |                          |             |           |
| 8   | Piperazine                         | 4                  | 9                        | NF          | [18]      |
|     | Trimesoyl chloride                 | 0.8                |                          |             |           |
|     | N-aminoethyl Piperazine            | 4.2                |                          |             |           |
|     | Propane Sulfonate                  |                    |                          |             |           |
| 9   | m-Phenylenediamine                 | 19                 | 66.4                     | RO          | [19]      |
|     | Trimesoyl chloride                 | 0.4                |                          |             |           |
|     | Dimethyl sulfoxide                 | 26                 |                          |             |           |
|     | Triethylamine                      | 11                 |                          |             |           |
|     | Camphorsulfonic acid               | 10                 |                          |             |           |
| 10  | m-Phenylenediamine                 | 19                 | 45.1                     | NF          | [20]      |
|     | Trimesoyl chloride                 | 0.4                |                          |             |           |
|     | Triethylamine                      | 24                 |                          |             |           |
|     | Sodium dodecyl sulfate             | 1.7                |                          |             |           |
| 11  | Polyethyleneimine                  | 84.4               | 87                       | NF          | [21]      |
|     | Trimesoyl chloride                 | 2.6                |                          |             |           |
| 12  | Polyethyleneimine                  | 23.5               | 24                       | OSN         | [22]      |

|    |                         |      |      |     |      |
|----|-------------------------|------|------|-----|------|
|    | Isophthaloyl dichloride | 0.5  |      |     |      |
| 13 | Piperazine              | 2.3  | 3.1  | NF  | [23] |
|    | Trimesoyl chloride      | 0.8  |      |     |      |
| 14 | Piperazine              | 23.2 | 24   | NF  | [24] |
|    | Trimesoyl chloride      | 0.8  |      |     |      |
| 15 | m-Phenylenediamine      | 33.6 | 34.2 | OSN | [25] |
|    | Trimesoyl chloride      | 0.6  |      |     |      |
| 16 | m-Phenylenediamine      | 18.9 | 19.3 | OSN | [26] |
|    | Trimesoyl chloride      | 0.4  |      |     |      |
| 17 | m-Phenylenediamine      | 11.6 | 12   | OSN | [27] |
|    | Trimesoyl chloride      | 0.4  |      |     |      |
| 18 | m-Phenylenediamine      | 18.5 | 18.9 | OSN | [28] |
|    | Trimesoyl chloride      | 0.4  |      |     |      |
| 19 | m-Phenylenediamine      | 18.5 | 18.9 | OSN | [29] |
|    | Trimesoyl chloride      | 0.4  |      |     |      |
| 20 | Polyethyleneimine       | 23.5 |      |     |      |
|    | Isophthaloyl dichloride | 0.5  | 57.9 | OSN | [30] |
|    | Ethylenediamine         | 33.9 |      |     |      |
| 21 | Resorcinol              | 19   | 19.8 | OSN | [31] |
|    | Trimesoyl chloride      | 0.8  |      |     |      |
| 22 | m-Phenylenediamine      | 19   |      |     |      |
|    | Trimesoyl chloride      | 0.4  | 39.8 | OSN | [32] |
|    | Sodium dodecyl sulfate  | 0.4  |      |     |      |
|    | Triethylamine           | 20   |      |     |      |
| 23 | m-Phenylenediamine      | 14   | 14.2 | OSN | [33] |
|    | Trimesoyl chloride      | 0.2  |      |     |      |
| 24 | m-Phenylenediamine      | 37   | 40.8 | OSN | [34] |
|    | Trimesoyl chloride      | 3.8  |      |     |      |
| 25 | m-Phenylenediamine      | 19   | 19.4 | OSN | [35] |
|    | Trimesoyl chloride      | 0.4  |      |     |      |

**Table S13.** Chemical hazards and toxicity of petroleum-based monomers used for TFC membrane fabrication.

| No. | Monomer & Additive                                                                                              | Pictogram | Reference |
|-----|-----------------------------------------------------------------------------------------------------------------|-----------|-----------|
| 0   | Genipin<br>Priamine                                                                                             |           | This work |
| 1   | Resorcinol<br>Trimesoyl chloride                                                                                |           | [9]       |
| 2   | <i>m</i> -Phenylenediamine<br>Trimesoyl chloride<br>Sodium dodecyl sulfate<br>Triethylamine                     |           | [12]      |
| 3   | <i>m</i> -Phenylenediamine<br>Trimesoyl chloride                                                                |           | [13]      |
| 4   | <i>m</i> -Phenylenediamine<br>Trimesoyl chloride                                                                |           | [14]      |
| 5   | <i>m</i> -Phenylenediamine<br>Trimesoyl chloride                                                                |           | [15]      |
| 6   | Piperazine<br>3,3',5,5'-iphenyl tetraacyl chloride<br>Sodium hydroxide<br>Sodium dodecyl sulfate                |           | [16]      |
| 7   | Piperazine<br>Trimesoyl chloride                                                                                |           | [17]      |
| 8   | Piperazine<br>Trimesoyl chloride<br>N-aminoethyl Piperazine<br>Propane Sulfonate                                |           | [18]      |
| 9   | <i>m</i> -Phenylenediamine<br>Trimesoyl chloride<br>Dimethyl sulfoxide<br>Triethylamine<br>Camphorsulfonic acid |           | [19]      |
| 10  | <i>m</i> -Phenylenediamine<br>Triethylamine<br>Trimesoyl chloride<br>Sodium dodecyl sulfate                     |           | [20]      |
| 11  | Polyethyleneimine<br>Trimesoyl chloride                                                                         |           | [21]      |



| No. | Monomer & Additive                                                                          | Pictogram | Reference |
|-----|---------------------------------------------------------------------------------------------|-----------|-----------|
| 12  | Polyethyleneimine<br>Isophathalyol dicloride                                                |           | [22]      |
| 13  | Piperazine<br>Trimesoyl chloride                                                            |           | [23]      |
| 14  | Piperazine<br>Trimesoyl chloride                                                            |           | [24]      |
| 15  | <i>m</i> -Phenylenediamine<br>Trimesoyl chloride                                            |           | [25]      |
| 16  | <i>m</i> -Phenylenediamine<br>Trimesoyl chloride                                            |           | [26]      |
| 17  | <i>m</i> -Phenylenediamine<br>Trimesoyl chloride                                            |           | [27]      |
| 18  | <i>m</i> -Phenylenediamine<br>Trimesoyl chloride                                            |           | [28]      |
| 19  | <i>m</i> -Phenylenediamine<br>Trimesoyl chloride                                            |           | [29]      |
| 20  | Polyethyleneimine<br>Isophathalyol dicloride<br>Ethylenediamine                             |           | [30]      |
| 21  | Resorcinol<br>Trimesoyl chloride                                                            |           | [31]      |
| 22  | <i>m</i> -Phenylenediamine<br>Trimesoyl chloride<br>Sodium dodecyl sulfate<br>Triethylamine |           | [32]      |
| 23  | <i>m</i> -Phenylenediamine<br>Trimesoyl chloride                                            |           | [33]      |
| 24  | <i>m</i> -Phenylenediamine<br>Trimesoyl chloride                                            |           | [34]      |
| 25  | <i>m</i> -Phenylenediamine<br>Trimesoyl chloride                                            |           | [35]      |

= 1 mmol / 100 mL

**Table S14.** Total mole number of plant-based monomers.

| No | Monomer & additive         | Mole number (mmol) | Total mole number (mmol) | Application | Reference |
|----|----------------------------|--------------------|--------------------------|-------------|-----------|
| 0  | Genipin                    | 1.1                | 2.7                      | OSN         | This work |
|    | Priamine                   | 1.6                |                          |             |           |
| 1  | Tannic acid                | 0.06               | 2.25                     | NF          | [36]      |
|    | Cyclohexane-1,4-diamine    | 2.19               |                          |             |           |
| 2  | Tannic acid                | 0.06               | 0.55                     | OSN         | [37]      |
|    | Terephthaloyl chloride     | 0.49               |                          |             |           |
| 3  | Catechol                   | 0.91               | 1.83                     | -           | [38]      |
|    | <i>m</i> -Phenylenediamine | 0.92               |                          |             |           |
| 4  | Tannic acid                | 0.04               | 0.07                     | NF          | [39]      |
|    | Trimesoyl chloride         | 0.03               |                          |             |           |
| 5  | Quercetin                  | 6.62               | 27.61                    | OSN         | [40]      |
|    | Sodium hydroxide           | 20                 |                          |             |           |
|    | Terephthaloyl chloride     | 0.99               |                          |             |           |
| 6  | Tannic acid                | 0.04               | 4.69                     | NF          | [41]      |
|    | Polyethyleneimine          | 4.65               |                          |             |           |
| 7  | Morin hydrate              | 6.75               | 7.74                     | OSN         | [42]      |
|    | Terephthaloyl chloride     | 0.99               |                          |             |           |
| 8  | Catechin                   | 6.89               | 27.09                    | OSN         | [43]      |
|    | Sodium hydroxide           | 20                 |                          |             |           |
|    | Terephthaloyl chloride     | 0.2                |                          |             |           |
| 9  | $\alpha$ -cyclodextrin     | 2.06               | 15.16                    | OSN         | [44]      |
|    | Sodium hydroxide           | 12.35              |                          |             |           |
|    | Trimesoyl chloride         | 0.75               |                          |             |           |
| 10 | Tannic acid                | 0.1                | 0.2                      | OSN         | [45]      |
|    | Priamine                   | 0.1                |                          |             |           |
| 11 | Chitosan                   | 0.5                | 3.5                      | OSN         | [11]      |
|    | 2,5-Furandicarboxaldehyde  | 3                  |                          |             |           |

**Table S15.** Chemical hazards and toxicity of plant-based monomers for TFC membranes.

| No. | Monomer & Additive                                               | Pictogram | Reference |
|-----|------------------------------------------------------------------|-----------|-----------|
| 0   | Genipin<br>Priamine                                              |           | This work |
| 1   | Tannic acid<br>Cyclohexane-1,4diamine                            |           | [36]      |
| 2   | Tannic acid<br>Terephthaloyl chloride                            |           | [37]      |
| 3   | Catechol<br><i>m</i> -Phenylenediamine                           |           | [38]      |
| 4   | Tannic acid<br>Trimesoyl chloride                                |           | [39]      |
| 5   | Quercetin<br>Sodium hydroxide<br>Terephthaloyl chloride          |           | [40]      |
| 6   | Tannic acid<br>Polyethyleneimine                                 |           | [41]      |
| 7   | Morin hydrate<br>Terephthaloyl chloride                          |           | [42]      |
| 8   | Catechin<br>Sodium hydroxide<br>Terephthaloyl chloride           |           | [43]      |
| 9   | $\alpha$ -cyclodextrin<br>Sodium hydroxide<br>Trimesoyl chloride |           | [44]      |
| 10  | Tannic acid<br>Priamine                                          |           | [45]      |
| 11  | Chitosan<br>2,5-Furandicarboxaldehyde                            |           | [11]      |

= 1 mmol / 100 mL

Besides the presented sustainability analysis, the authors would like to mention the importance of technological context [46–48], which should be considered if the membranes are scaled up.

## References

1. F.-L. Mi, H.-W. Sung and S.-S. Shyu, *J. Appl. Polym. Sci.*, 2001, **81**, 1700–1711.
2. M. F. Butler, Y.-F. Ng and P. D. A. Pudney, *J. Polym. Sci. A: Polym. Chem.*, 2003, **41**, 3941–3953.
3. J. R. Reimers and L. E. Hall, *J. Am. Chem. Soc.*, 1999, **121**, 3730–3744.
4. S. Karan, Z. Jiang and G. Livingston Andrew, *Science*, 2015, **348**, 1347–1351.
5. P. Marchetti, M. F. Jimenez Solomon, G. Szekely and A. G. Livingston, *Chem. Rev.*, 2014, **114**, 10735–10806.
6. X. X. Loh, M. Sairam, A. Bismarck, J. H. G. Steinke, A. G. Livingston and K. Li, *J. Membr. Sci.*, 2009, **326**, 635–642.
7. S. M. Dutczak, F. P. Cuperus, M. Wessling and D. F. Stamatialis, *Sep. Purif. Technol.*, 2013, **102**, 142–146.
8. X. X. Loh, M. Sairam, J. H. G. Steinke, A. G. Livingston, A. Bismarck and K. Li, *Chem. Commun.*, 2008, DOI: 10.1039/B815632H, 6324–6326.
9. M. F. Jimenez-Solomon, Q. Song, K. E. Jelfs, M. Munoz-Ibanez and A. G. Livingston, *Nat. Mater.*, 2016, **15**, 760–767.
10. H. Siddique, E. Rundquist, Y. Bhole, L. G. Peeva and A. G. Livingston, *J. Membr. Sci.*, 2014, **452**, 354–366.
11. S.-H. Park, C. Yang, N. Ayaril and G. Szekely, *ACS Sustain. Chem. Eng.*, 2022, **10**, 998–1007.
12. C. Klaysom, S. Hermans, A. Gahlaut, S. Van Craenenbroeck and I. F. J. Vankelecom, *J. Membr. Sci.*, 2013, **445**, 25–33.
13. W. Xie, G. M. Geise, B. D. Freeman, H.-S. Lee, G. Byun and J. E. McGrath, *J. Membr. Sci.*, 2012, **403-404**, 152–161.
14. S.-J. Park, S. J. Kwon, H.-E. Kwon, M. G. Shin, S.-H. Park, H. Park, Y.-I. Park, S.-E. Nam and J.-H. Lee, *Polymer*, 2018, **144**, 159–167.
15. M. F. Jimenez Solomon, Y. Bhole and A. G. Livingston, *J. Membr. Sci.*, 2012, **423-424**, 371–382.
16. H. Wang, Q. Zhang and S. Zhang, *J. Membr. Sci.*, 2011, **378**, 243–249.
17. M. Jahanshahi, A. Rahimpour and M. Peyravi, *Desalination*, 2010, **257**, 129–136.
18. Q.-F. An, W.-D. Sun, Q. Zhao, Y.-L. Ji and C.-J. Gao, *J. Membr. Sci.*, 2013, **431**, 171–179.
19. S. H. Kim, S.-Y. Kwak and T. Suzuki, *Environ. Sci. Technol.*, 2005, **39**, 1764–1770.
20. L. Shao, X. Q. Cheng, Y. Liu, S. Quan, J. Ma, S. Z. Zhao and K. Y. Wang, *J. Membr. Sci.*, 2013, **430**, 96–105.
21. D. Wu, Y. Huang, S. Yu, D. Lawless and X. Feng, *J. Membr. Sci.*, 2014, **472**, 141–153.
22. M. Peyravi, A. Rahimpour and M. Jahanshahi, *J. Membr. Sci.*, 2012, **423-424**, 225–237.
23. Y. Li, Y. Su, Y. Dong, X. Zhao, Z. Jiang, R. Zhang and J. Zhao, *Desalination*, 2014, **333**, 59–65.
24. N. Misdan, W. J. Lau, A. F. Ismail and T. Matsuura, *Desalination*, 2013, **329**, 9–18.
25. J. H. Kim, S. J. Moon, S. H. Park, M. Cook, A. G. Livingston and Y. M. Lee, *J. Membr. Sci.*, 2018, **550**, 322–331.
26. M. Namvar-Mahboub and M. Pakizeh, *Korean J. Chem. Eng.*, 2014, **31**, 327–337.
27. T.-D. Lu, B.-Z. Chen, J. Wang, T.-Z. Jia, X.-L. Cao, Y. Wang, W. Xing, C. H. Lau and S.-P. Sun, *Journal of Materials Chemistry A*, 2018, **6**, 15047–15056.
28. M. Namvar-Mahboub and M. Pakizeh, *Sep. Purif. Technol.*, 2013, **119**, 35–45.
29. M. F. Jimenez-Solomon, P. Gorgojo, M. Munoz-Ibanez and A. G. Livingston, *J. Membr. Sci.*, 2013, **448**, 102–113.

30. M. Peyravi, M. Jahanshahi, A. Rahimpour, A. Javadi and S. Hajavi, *Chem. Eng. J.*, 2014, **241**, 155–166.
31. S. Yang, Y. n. Xing, J. Zhang, B. Su, B. Mandal, X. Gao and C. Gao, *Desalin. Water Treat.*, 2019, **157**, 18–28.
32. S.-P. Sun, T.-S. Chung, K.-J. Lu and S.-Y. Chan, *AIChE J.*, 2014, **60**, 3623–3633.
33. S. H. Park, Y. J. Kim, S. J. Kwon, M. G. Shin, S. E. Nam, Y. H. Cho, Y. I. Park, J. F. Kim and J.-H. Lee, *ACS Appl. Mater. Interfaces*, 2018, **10**, 44050–44058.
34. P. H. H. Duong, D. H. Anjum, K.-V. Peinemann and S. P. Nunes, *J. Membr. Sci.*, 2018, **563**, 684–693.
35. L. Xia, J. Ren, M. Weyd and J. R. McCutcheon, *J. Membr. Sci.*, 2018, **563**, 857–863.
36. M. He, H. Sun, H. Sun, X. Yang, P. Li and Q. J. Niu, *Sep. Purif. Technol.*, 2019, **223**, 250–259.
37. L. Pérez-Manríquez, P. Neelakanda and K.-V. Peinemann, *J. Membr. Sci.*, 2017, **541**, 137–142.
38. W.-Z. Qiu, G.-P. Wu and Z.-K. Xu, *ACS Appl. Mater. Interfaces*, 2018, **10**, 5902–5908.
39. Y. Zhang, Y. Su, J. Peng, X. Zhao, J. Liu, J. Zhao and Z. Jiang, *J. Membr. Sci.*, 2013, **429**, 235–242.
40. M. H. Abdellah, L. Pérez-Manríquez, T. Puspasari, C. A. Scholes, S. E. Kentish and K.-V. Peinemann, *Adv. Sustain. Syst.*, 2018, **2**, 1800043.
41. Q. Li, Z. Liao, X. Fang, D. Wang, J. Xie, X. Sun, L. Wang and J. Li, *J. Membr. Sci.*, 2019, **584**, 324–332.
42. L. Pérez-Manríquez, P. Neelakanda and K.-V. Peinemann, *J. Membr. Sci.*, 2018, **554**, 1–5.
43. M. H. Abdellah, L. Pérez-Manríquez, T. Puspasari, C. A. Scholes, S. E. Kentish and K.-V. Peinemann, *J. Membr. Sci.*, 2018, **567**, 139–145.
44. J. Liu, D. Hua, Y. Zhang, S. Japip and T.-S. Chung, *Adv. Mater.*, 2018, **30**, 1705933.
45. S.-H. Park, A. Alammari, Z. Fulop, B. A. Pulido, S. P. Nunes and G. Szekely, *Green Chem.*, 2021, **23**, 1175–1184.
46. C. Ji, Z. Zhai, C. Jiang, P. Hu, S. Zhao, S. Xue, Z. Yang, T. He and Q. J. Niu, *Desalination*, 2021, **500**, 114869.
47. H. Wang, L. Wang, C. Liu, Y. Xu, Y. Zhuang, Y. Zhou, S. Gu, W. Xu and H. Yang, *Int. J. Biol. Macromol.*, 2019, **133**, 902–910.
48. N. More, M. Avhad and S. Utekar, *Polym. Bull.*, 2022 <https://doi.org/10.1007/s00289-022-04135-z>
